# Supplementary material
Source: Springer Nature journal article supplement (https://www.springermedizin.de/resource/supplementary/12913_2007_670_MOESM3_ESM.pdf/9535278)

## Public facilities

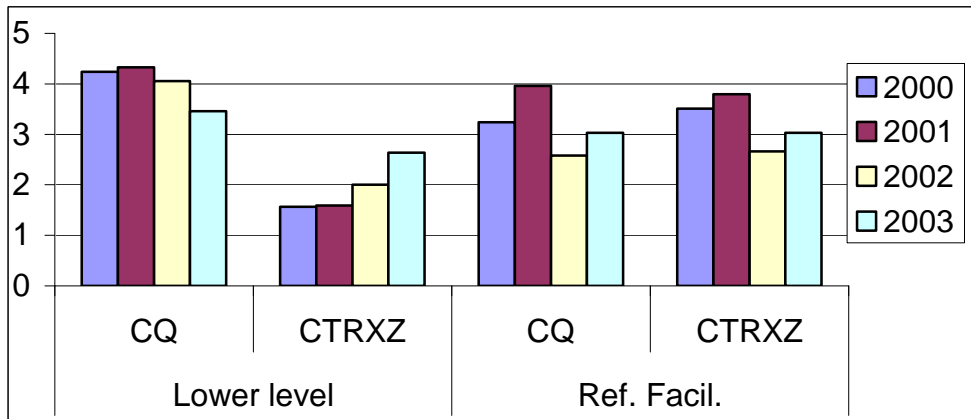

## Private not For Profit facilities

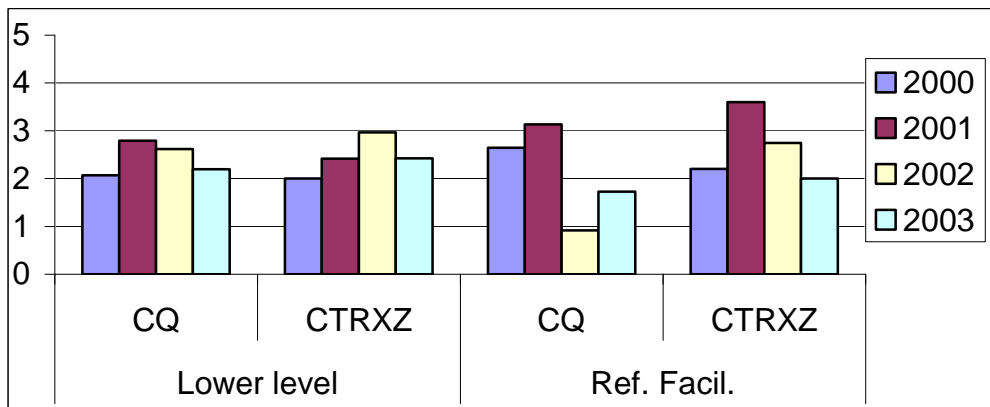

Supplement: MOESM3 [file 9535278]
